# Supplementary material
Source: publisher figshare collection journal article supplement (https://acs.figshare.com/ndownloader/files/8740747)
Supplement: Supplementary file 1 [file 8740747]

# Supporting Information

## Oximes and Hydrazones in Bioconjugation: Mechanism and Catalysis

Dominik K. Kölmel and Eric T. Kool

Department of Chemistry, Stanford University, Stanford, California 94305, USA

Email: [kool@stanford.edu](mailto:kool@stanford.edu)

### Selected protocols for oxime/hydrazone bioconjugation

#### Protocol 1: Labeling of sialic acids on cell surfaces (reference 1)

Step 1: Oxidation of sialic acids with sodium periodate

The cells (BJA-B K20 or K88) were washed with Dulbecco's phosphate buffered saline (pH 7.4, PBS, Invitrogen) and suspended to  $1 \times 10^6$  cells/mL in PBS containing 1 mM sodium periodate. The cells were treated with sodium periodate for 30 min at 4 °C and the reaction was subsequently quenched with 1 mM glycerol before washing in PBS.

Step 2: Aniline-catalyzed oxime formation

The periodate treated cells were washed in PBS and suspended to  $1 \times 10^6$  cells/mL in PBS/5% fetal bovine serum (pH 6.7) containing 100  $\mu$ M of the respective alkoxyamine and 10 mM aniline. The reaction was carried out at 4 °C for 90 min with gentle agitation on an end-over-end rotator or a rocking tray. Subsequently, the cells were washed in PBS.

**Protocol 2: Labeling of aldehyde-containing DNA (reference 2)**

Aldehyde-containing DNA (100  $\mu$ M) was reacted with the respective  $\alpha$ -effect nucleophile (alkoxyamine or hydrazide, 0.4 mM and 10 mM, respectively) in the presence of *p*-anisidine (100 mM) in sodium phosphate buffer (40 mM, pH 5-6). The reaction was carried out at room temperature for 24 h. The obtained yields were typically >90%.

**Protocol 3: *p*-Phenylenediamine-catalyzed one-pot oxime-bioconjugation with proteins that contain N-terminal serine (reference 3)**

The protein (600  $\mu$ M) was reacted with sodium periodate (600  $\mu$ M) in 105 mM sodium phosphate buffer (pH 7.0, including 125 mM NaCl). The mixture was allowed to incubate for 15 min at room temperature with mild agitation. The oxidation was terminated by the addition of serine to a final concentration of 6 mM. After addition of the quencher, the solution was mixed and incubated for 1 h at room temperature. Subsequent oxime coupling was performed in the same reaction mixture by addition of the respective alkoxyamine stock solution in sodium phosphate (pH 7.0, 100 mM) and *p*-phenylenediamine, which resulted in final concentrations of 200  $\mu$ M protein, 1 mM alkoxyamine, and 10 mM *p*-phenylenediamine. The reaction tube was covered with foil and incubated for 22 h at room temperature. The obtained yields were typically >80%.

**Protocol 4: *m*-Phenylenediamine-catalyzed oxime-bioconjugation with aldehyde-containing proteins (reference 4)**

The respective alkoxyamine (250  $\mu$ M) was reacted with an aldehyde-containing protein (50  $\mu$ M) in the presence of *m*-phenylenediamine (80 mM) in Tris•HCl buffer (50 mM, pH 7.5). After 5 min at room temperature, the mixture was analyzed via SDS-PAGE. The labeling of the protein was almost quantitative.

**Protocol 5: Fast catalyst-free hydrazone-bioconjugation with hydrazide-containing proteins and *ortho*-chlorobenzaldehydes (reference 5)**

The protein hydrazide (30  $\mu$ M) was reacted with *ortho*-chlorobenzaldehyde (or a derivative thereof, 200  $\mu$ M) in aqueous PME buffer (100 mM PIPES, 1 mM  $\text{MgSO}_4$ , 2 mM EGTA at pH 7.0). The mixture was stirred at room temperature for 30 min and subsequently analyzed by RP-HPLC. The respective hydrazone was typically obtained with >90% yield.

**Protocol 6: Doxorubicin-labeling of hydrazide-containing peptides in methanol (reference 6)**

The respective peptide (10  $\mu$ mol) and doxorubicin hydrochloride (20  $\mu$ mol, 2 equiv.) were dissolved in anhydrous methanol (3 mL). Trifluoroacetic acid (6  $\mu$ L) was added and the mixture was stirred in the dark at room temperature for 24 h. Subsequently, the product was purified via semi-preparative HPLC (solvent A:  $\text{NH}_4\text{OAc}$  buffer, pH 7; solvent B: acetonitrile). The conjugate was obtained in 62% yield.

**References**

- (1) Zeng, Y.; Ramya, T. N. C.; Dirksen, A.; Dawson, P. E.; Paulson, J. C., High-efficiency labeling of sialylated glycoproteins on living cells. *Nat. Methods* **2009**, *6*, 207-209.
- (2) Hardisty, R. E.; Kawasaki, F.; Sahakyan, A. B.; Balasubramanian, S., Selective Chemical Labeling of Natural T Modifications in DNA. *J. Am. Chem. Soc.* **2015**, *137*, 9270-9272.
- (3) Wendeler, M.; Grinberg, L.; Wang, X.; Dawson, P. E.; Baca, M., Enhanced Catalysis of Oxime-Based Bioconjugations by Substituted Anilines. *Bioconjugate Chem.* **2014**, *25*, 93-101.
- (4) Rashidian, M.; Mahmoodi, M. M.; Shah, R.; Dozier, J. K.; Wagner, C. R.; Distefano, M. D., A Highly Efficient Catalyst for Oxime Ligation and Hydrazone-Oxime Exchange Suitable for Bioconjugation. *Bioconjugate Chem.* **2013**, *24*, 333-342.
- (5) Xu, Y.; Xu, L.; Xia, Y.; Guan, C.-J.; Guo, Q.-X.; Fu, Y.; Wang, C.; Li, Y.-M., Fast and catalyst-free hydrazone ligation *via ortho*-halo-substituted benzaldehydes for protein C-terminal labeling at neutral pH. *Chem. Commun.* **2015**, *51*, 13189-13192.

- (6) Jin, Y.; Huang, Y.; Yang, H.; Liu, G.; Zhao, R., A peptide-based pH-sensitive drug delivery system for targeted ablation of cancer cells. *Chem. Commun.* **2015**, 51, 14454-14457.
